# Supplementary material for: A series of Zn(ii) and Cd(ii) coordination compounds based on 4-(4H-1,2,4-triazol-4-yl)benzoic acid: synthesis, structure and photoluminescence properties
Source: Royal Society of Chemistry journal article supplement (doi:10.1039/c5ce01815c), 2015-11-10
Supplement: c5ce01815c1.pdf [file c5ce01815c1.pdf]

*Supporting Information for*

**A series of Zn(II) and Cd(II) coordination compounds based on 4-(4*H*-1,2,4-triazol-4-yl)benzoic acid: synthesis, structure and photoluminescent properties**

Li-Bo Yang, Hong-Can Wang, Xiao-Dan Fang , Si-Jin Chen, Quan-Qing Xu, Ai-Xin Zhu\* and Zhi Yang\*

*Faculty of Chemistry and Chemical Engineering, Yunnan Normal University, Kunming 650500, China.*

E-mail: zaxchem@126.com (A.-X. Zhu); kmyangz@hotmail.com (Zhi. Yang).

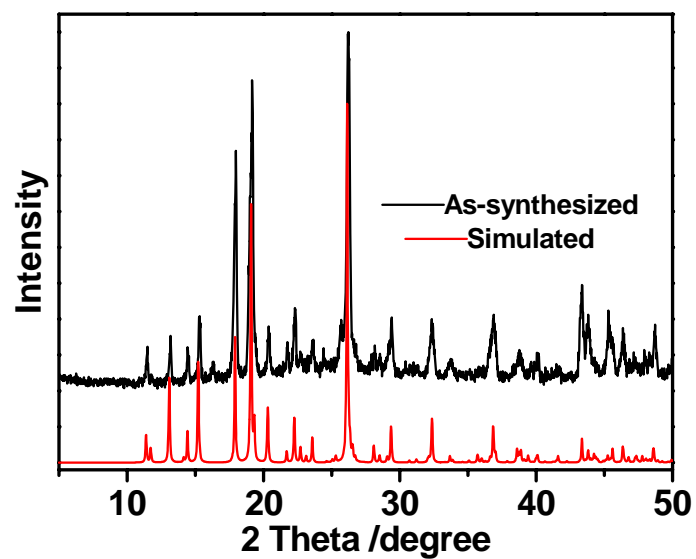

Fig. S1 PXRD of 1.

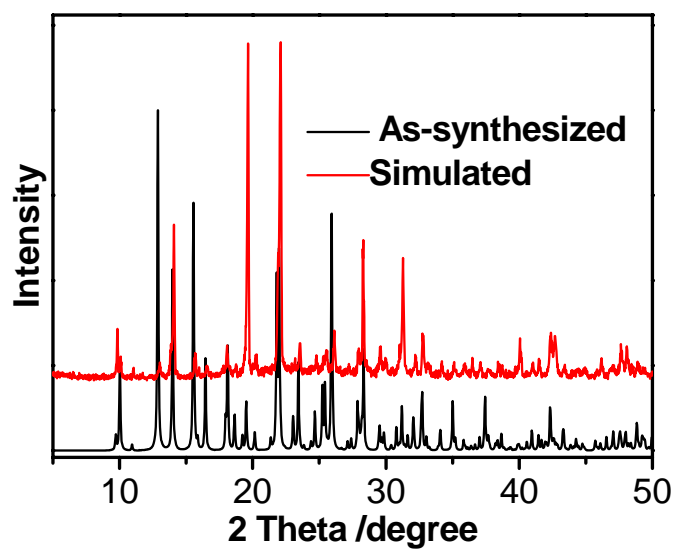

Fig. S2 PXRD of 2.

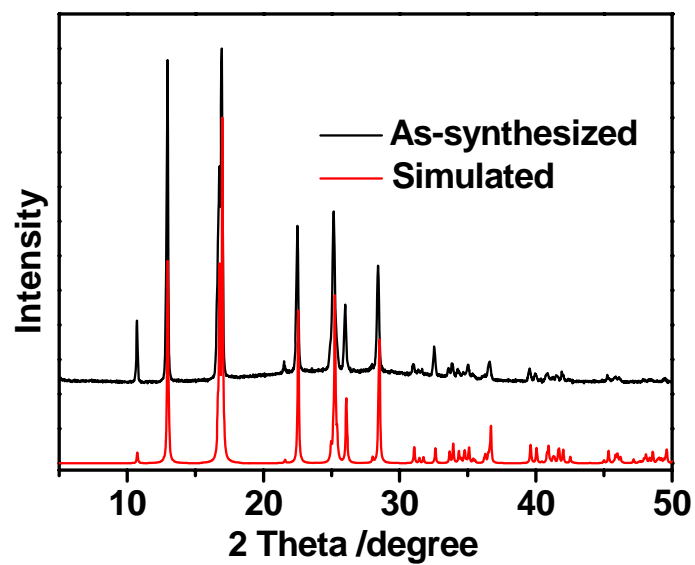

Fig. S3 PXRD of 3.

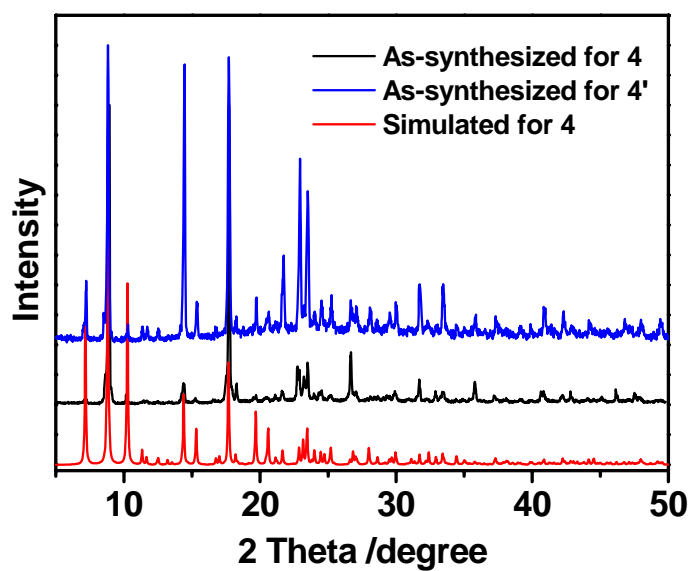

Fig. S4 PXRD of 4.

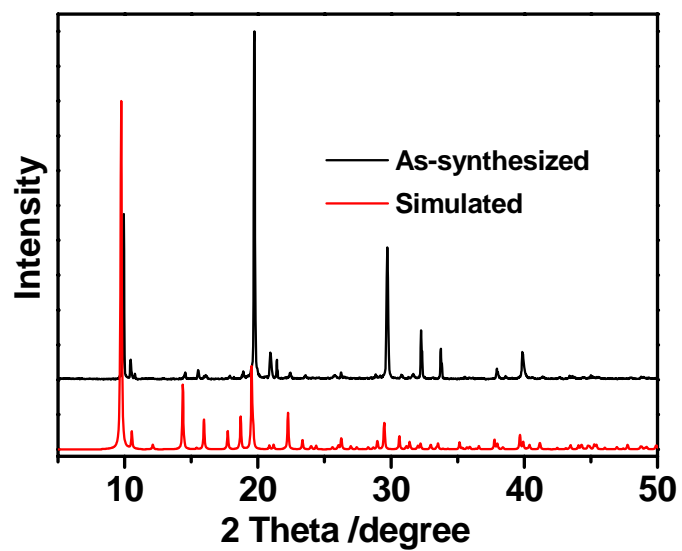

Fig. S5 PXRD of 5.

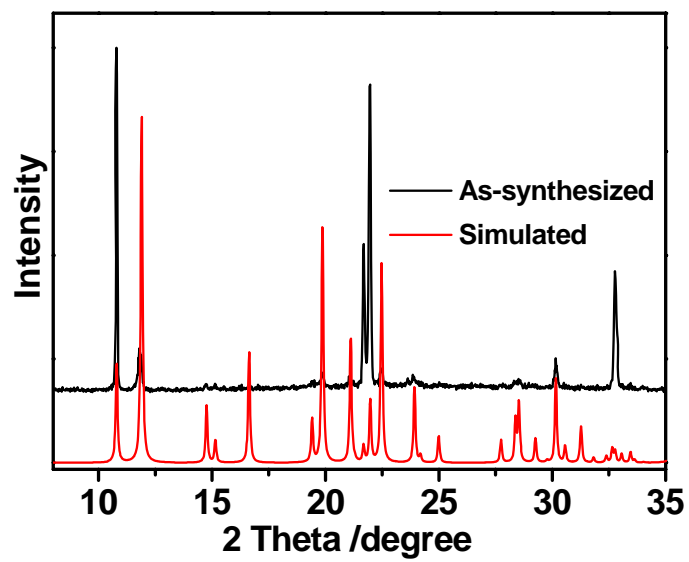

Fig. S6 PXRD of 6.

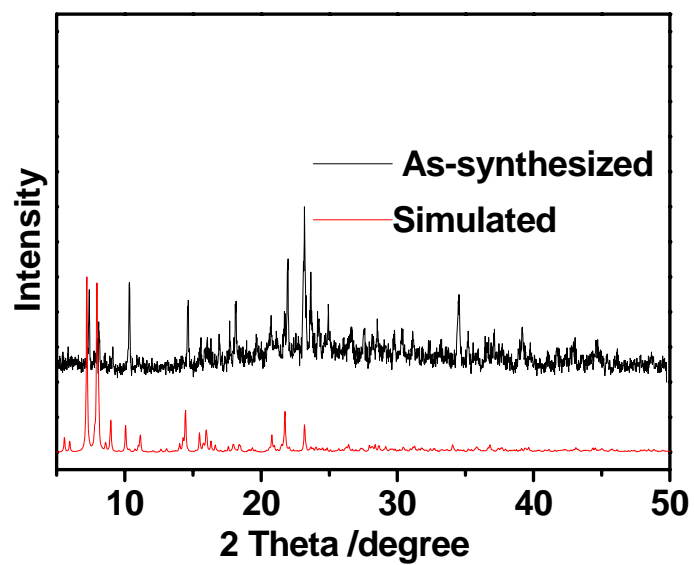

**Fig. S7** PXRD of **7**.

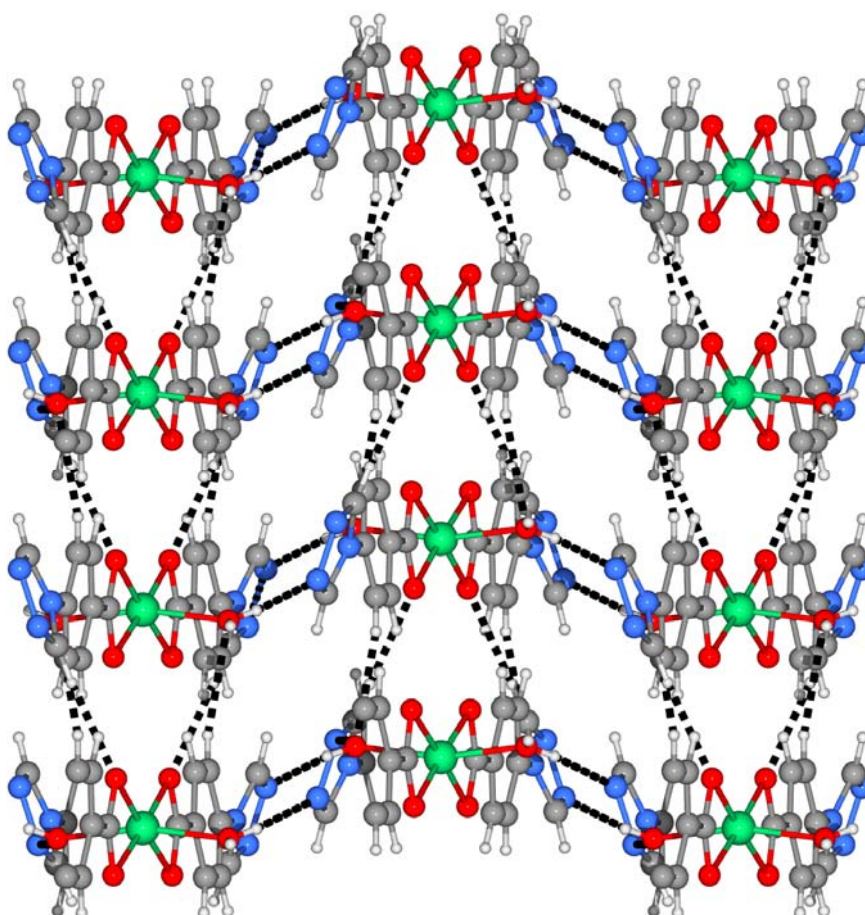

**Fig. S8** View of the 3D supramolecular network through the C-H...O weak interactions in **1** along the *a*-axis.

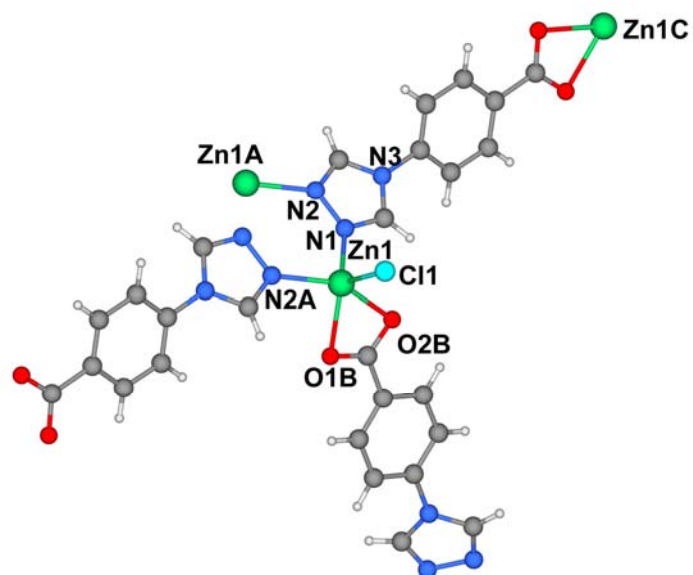

**Fig. S9** The coordination environments of the zinc atom and the 4-tba ligand in **2**. Symmetric codes: A:  $-x, -y, -z$ ; B:  $x-1, -y+1/2, z-1/2$ ; C:  $x+1, -y+1/2, z+1/2$ .

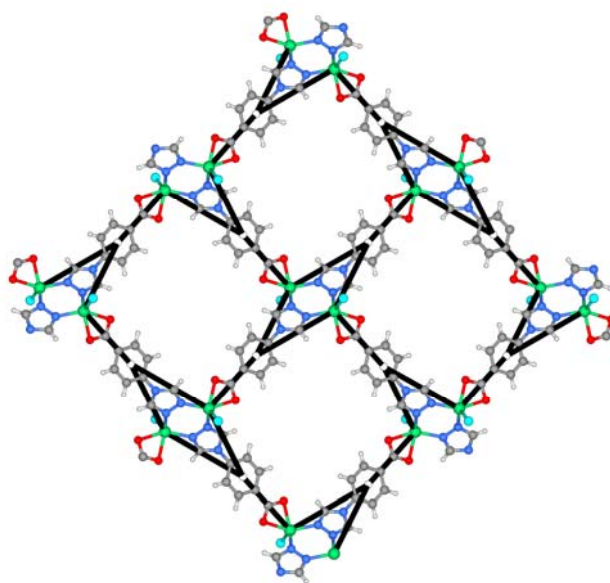

**Fig. S10** The 3-connected  $4.8^2$  topology in **2** when Zn and 4-tba are regarded as two kinds of 3-connected nodes.

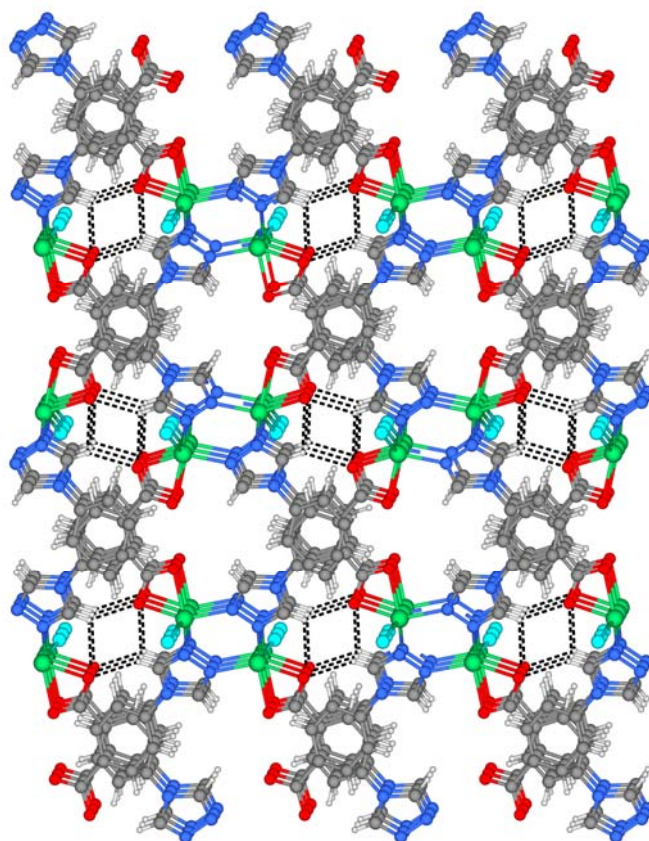

**Fig. S11** View of the 3D supramolecular network through the C-H...O weak interactions in **2** along the *c*-axis.

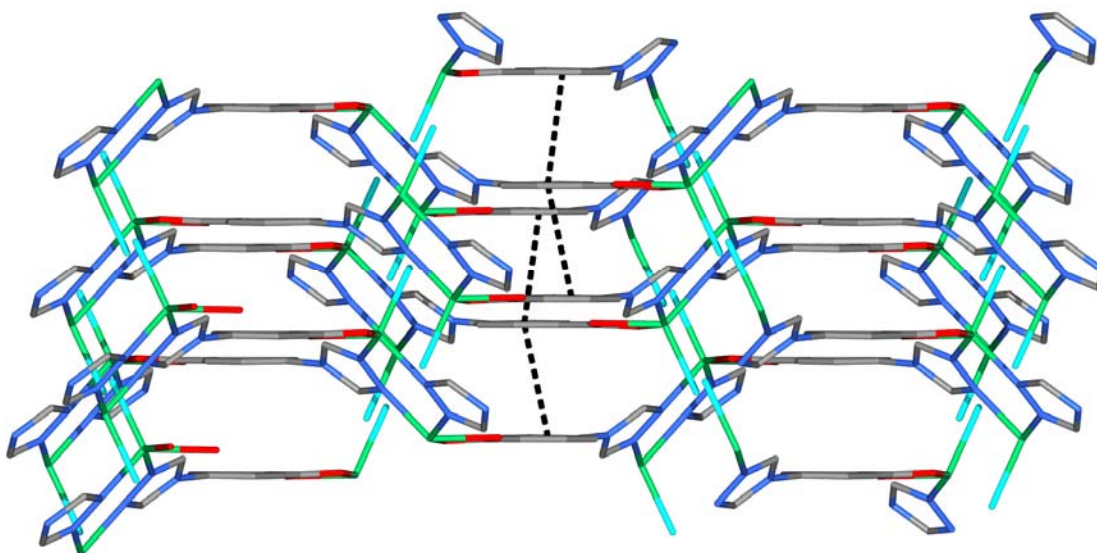

**Fig. S12** View of  $\pi$ - $\pi$  stacking interactions in **2**.

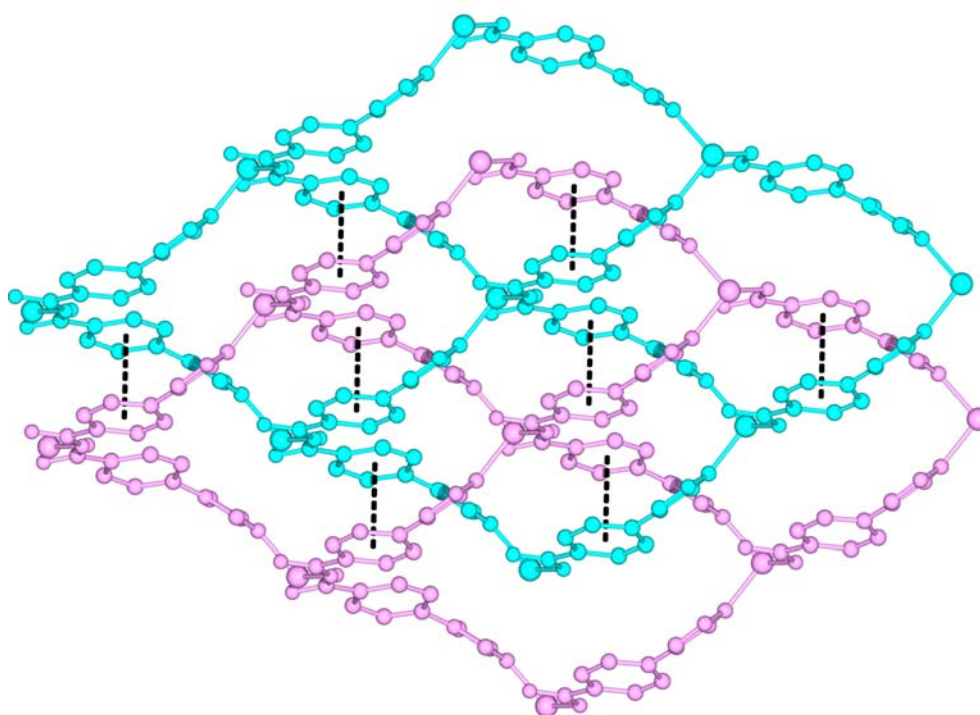

**Fig. S13** View of  $\pi$ - $\pi$  stacking interactions in **3**. The 2-fold interpenetrating 2D layers are shown different color and hydrogen atoms are omitted for clarity.

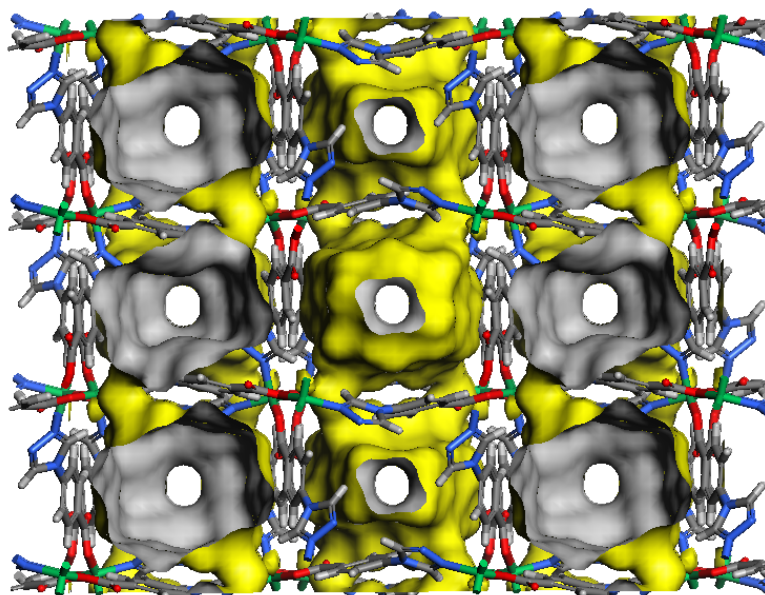

**Fig. S14** View of the 3D framework and channel structure of **4** along the *b*-axis.



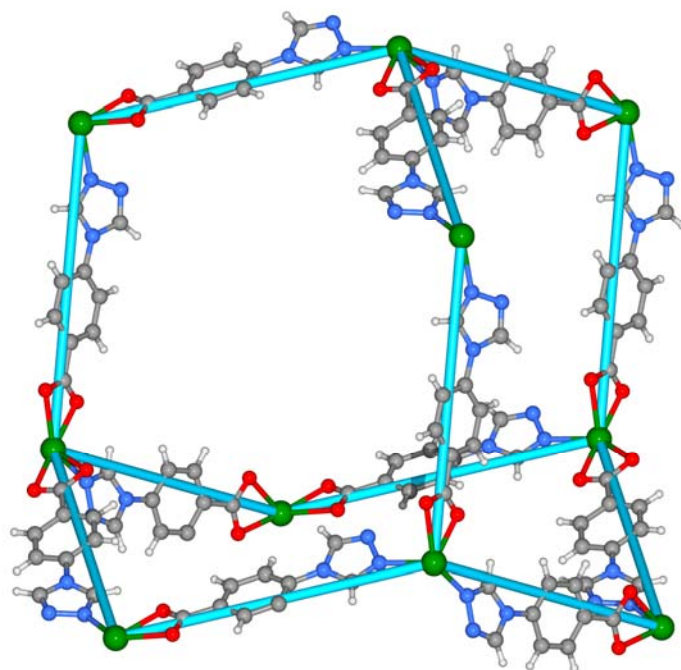

**Fig. S15** A single diamond motif in **5**.

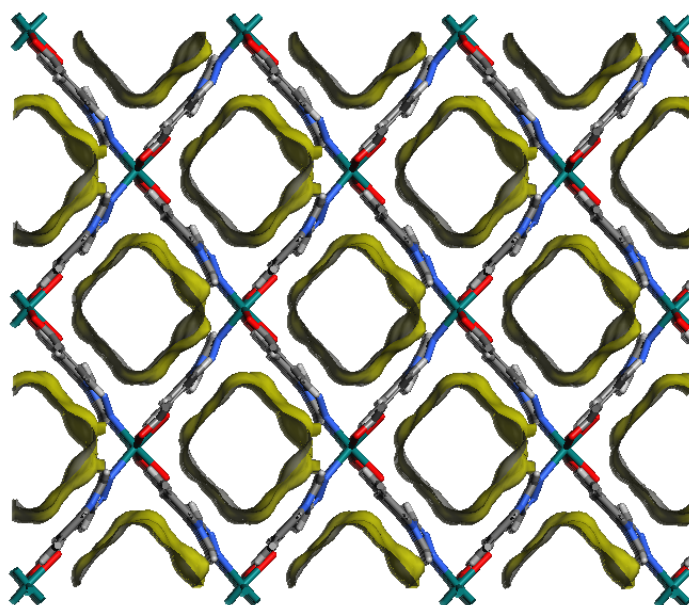

**Fig. S16** View of the 3D framework and channel structure of **5** along the *b*-axis.

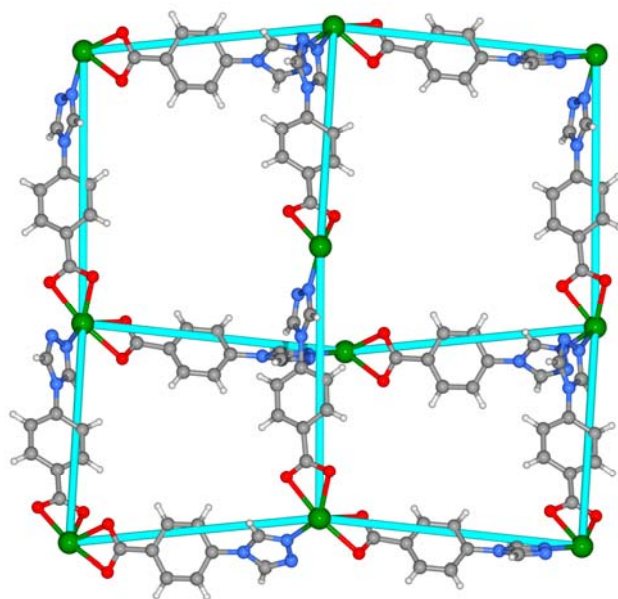

**Fig. S17** A single diamond motif in **6**.

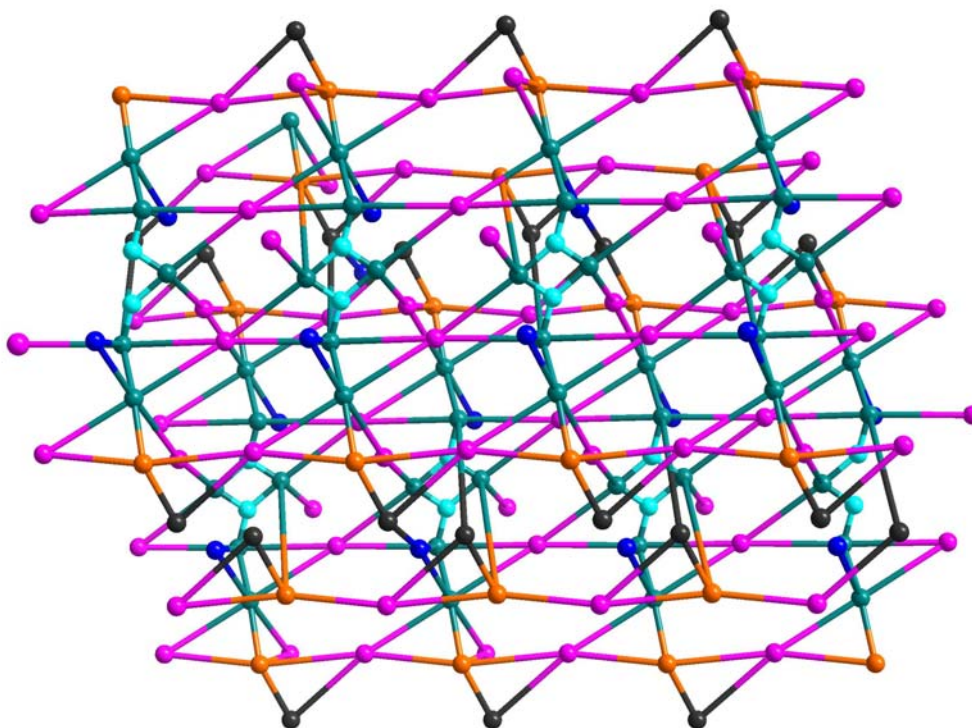

**Fig. S18** Topological representation of the 10-nodal (3,3,3,4,4,4,5,6,6,6)-connected net of **7**.

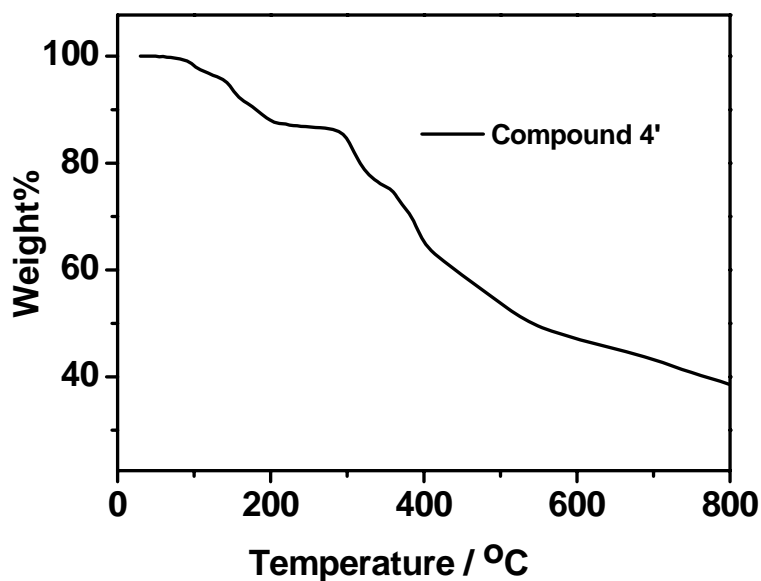

**Figure S19.** TG curve of compound **4'** synthesized by slow evaporation of the filtrate of **3**. The weight loss of 13.35% at temperatures below 238 °C is consistent with the removal of one half of free DMF and two water guest molecules per formula unit (calcd 14.11%).

**Table S1** The possible hydrogen bonds for compound **1** and **2**

| D-H...A               | d(D-H) | d(H...A) | d(D...A)  | <(DHA) |
|-----------------------|--------|----------|-----------|--------|
| <b>1</b>              |        |          |           |        |
| O(1W')-H(1WA)...N(1a) | 0.71   | 2.06     | 2.746(17) | 164.5  |
| O(1W')-H(1WB)...N(2b) | 0.80   | 2.04     | 2.790(17) | 155.8  |
| C(4)-H(4A)...O(1Wc)   | 0.93   | 2.49     | 3.295(15) | 145.3  |
| C(9)-H(9A)...O(1d)    | 0.93   | 2.40     | 3.329(4)  | 174.3  |
| <b>2</b>              |        |          |           |        |
| O(3)-H(3)...O(2e)     | 0.82   | 2.01     | 2.826(6)  | 173.3  |
| C(6)-H(6A)...O(3b)#5  | 0.93   | 2.57     | 3.496(7)  | 171.5  |
| C(8)-H(8A)...O(3f)#6  | 0.93   | 2.25     | 3.079(7)  | 147.4  |
| C(9)-H(9A)...O(1g)#7  | 0.93   | 2.48     | 2.965(6)  | 112.8  |
| C(9)-H(9A)...O(1e)    | 0.93   | 2.47     | 3.259(7)  | 142.3  |

Symmetry code: (a)  $-x+1, -y+1, -z+1$ ; (b)  $x-1, y, z$ ; (c)  $x+1/2, y+1/2, z$ ; (d)  $x+1/2, y-1/2, z$ ; (e)  $x, -y+1/2, z-1/2$ ; (f)  $x-1, -y+1/2, z+1/2$ ; (g)  $-x+1, y-1/2, -z+1/2$ .

**Table S2** The possible  $\pi$  -  $\pi$  interactions in complexes **1-7** calculated by program PLATON.<sup>S1</sup>

| type of $\pi$ - $\pi$ interactions | centroid-centroid distance (Å) | closest interplanar distance (Å) | offset angle (°) |
|------------------------------------|--------------------------------|----------------------------------|------------------|
| <b>1</b>                           |                                |                                  |                  |
| benzene ring – triazole ring       | 3.8662                         | 3.342                            | 13.11            |
| benzene ring – benzene ring        | 4.1349                         | 3.777                            | 0.00             |
| <b>2</b>                           |                                |                                  |                  |
| benzene ring – benzene ring        | 3.7768                         | 3.363                            | 0.49             |
| <b>3</b>                           |                                |                                  |                  |
| benzene ring – benzene ring        | 3.6562                         | 3.505                            | 0.67             |
| <b>4</b>                           |                                |                                  |                  |
| triazole ring – triazole ring      | 4.2493                         | 3.294                            | 0.04             |
| <b>5</b>                           |                                |                                  |                  |
| benzene ring – triazole ring       | 5.2286                         | 2.642                            | 71.59            |
| <b>6</b>                           |                                |                                  |                  |
| benzene ring – benzene ring        | 4.4961                         | 3.320                            | 16.78            |
| <b>7</b>                           |                                |                                  |                  |
| benzene ring – triazole ring       | 4.2252                         | 3.750                            | 16.29            |

**Topology Analysis of compound 7 by using TOPOS software.**<sup>S2</sup>

## Topology for Cl1

-----

Atom Cl1 links by bridge ligands and has

| Common vertex with |         |        |        |          | R(A-A) |   |
|--------------------|---------|--------|--------|----------|--------|---|
| Cd 3               | 0.1675  | 1.0053 | 0.4832 | ( 0 1 0) | 2.496Å | 1 |
| Cd 2               | 0.1763  | 0.8119 | 0.4083 | ( 0 0 0) | 2.586Å | 1 |
| Cd 3               | -0.1675 | 0.9947 | 0.5168 | ( 0 1 1) | 2.912Å | 1 |

## Topology for Sc1

-----

Atom Sc1 links by bridge ligands and has

| Common vertex with |        |         |        |          | R(A-A) |   |
|--------------------|--------|---------|--------|----------|--------|---|
| Cd 1               | 0.1746 | -0.2232 | 0.2481 | ( 0-1 0) | 5.339Å | 1 |

|      |        |         |        |          |        |   |
|------|--------|---------|--------|----------|--------|---|
| Cd 2 | 0.1763 | -0.1881 | 0.4083 | ( 0-1 0) | 5.457A | 1 |
| Cr 1 | 0.1651 | 0.5286  | 0.0038 | ( 0 0 0) | 7.238A | 1 |

Topology for Ti1

-----

Atom Ti1 links by bridge ligands and has

| Common vertex with |        |        |        |          | R(A-A) |   |
|--------------------|--------|--------|--------|----------|--------|---|
| Co 1               | 0.2055 | 0.7068 | 0.0765 | ( 0 0 0) | 6.293A | 1 |
| Cd 1               | 0.1746 | 0.7768 | 0.2481 | ( 0 0 0) | 6.402A | 1 |
| Cr 1               | 1.1651 | 0.5286 | 0.0038 | ( 1 0 0) | 6.502A | 1 |
| Co 1               | 1.2055 | 0.7068 | 0.0765 | ( 1 0 0) | 6.736A | 1 |

Topology for Ti2

-----

Atom Ti2 links by bridge ligands and has

| Common vertex with |        |        |        |          | R(A-A) |   |
|--------------------|--------|--------|--------|----------|--------|---|
| Cd 3               | 0.1675 | 0.0053 | 0.4832 | ( 0 0 0) | 6.274A | 1 |
| Co 1               | 0.2055 | 0.7068 | 0.0765 | ( 0 0 0) | 6.409A | 1 |
| Cd 1               | 0.1746 | 0.7768 | 0.2481 | ( 0 0 0) | 6.501A | 1 |

Topology for Ti3

-----

Atom Ti3 links by bridge ligands and has

| Common vertex with |        |        |        |          | R(A-A) |   |
|--------------------|--------|--------|--------|----------|--------|---|
| Cd 3               | 0.1675 | 1.0053 | 0.4832 | ( 0 1 0) | 6.407A | 1 |
| Cd 2               | 0.1763 | 0.8119 | 0.4083 | ( 0 0 0) | 6.449A | 1 |
| Cd 1               | 1.1746 | 0.7768 | 0.2481 | ( 1 0 0) | 6.528A | 1 |
| Cd 2               | 1.1763 | 0.8119 | 0.4083 | ( 1 0 0) | 6.541A | 1 |

Topology for Cr1

-----

Atom Cr1 links by bridge ligands and has

| Common vertex with |         |        |         |          | R(A-A)  |   |
|--------------------|---------|--------|---------|----------|---------|---|
| Co 1               | 0.2055  | 0.7068 | 0.0765  | ( 0 0 0) | 4.136A  | 1 |
| Ti 1               | -0.3267 | 0.7100 | 0.1099  | (-1 0 0) | 6.502A  | 1 |
| Sc 1               | 0.1760  | 0.0991 | 0.2052  | ( 0 0 0) | 7.238A  | 1 |
| Cd 2               | 0.1763  | 0.8119 | -0.5917 | ( 0 0-1) | 12.394A | 1 |

Topology for Co1

-----

Atom Co1 links by bridge ligands and has

| Common vertex with |         |        |         |          | R(A-A)  |   |
|--------------------|---------|--------|---------|----------|---------|---|
| Cr 1               | 0.1651  | 0.5286 | 0.0038  | ( 0 0 0) | 4.136A  | 1 |
| Cd 1               | 0.1746  | 0.7768 | 0.2481  | ( 0 0 0) | 4.266A  | 1 |
| Ti 1               | 0.6733  | 0.7100 | 0.1099  | ( 0 0 0) | 6.293A  | 1 |
| Ti 2               | 0.1690  | 0.3811 | 0.3222  | ( 0 0 0) | 6.409A  | 1 |
| Ti 1               | -0.3267 | 0.7100 | 0.1099  | (-1 0 0) | 6.736A  | 1 |
| Cd 3               | 0.1675  | 1.0053 | -0.5168 | ( 0 1-1) | 12.458A | 1 |

Topology for Cd1

-----

Atom Cd1 links by bridge ligands and has

| Common vertex with |         |        |        |          | R(A-A) |   |
|--------------------|---------|--------|--------|----------|--------|---|
| Cd 2               | 0.1763  | 0.8119 | 0.4083 | ( 0 0 0) | 3.805A | 1 |
| Co 1               | 0.2055  | 0.7068 | 0.0765 | ( 0 0 0) | 4.266A | 1 |
| Sc 1               | 0.1760  | 1.0991 | 0.2052 | ( 0 1 0) | 5.339A | 1 |
| Ti 1               | 0.6733  | 0.7100 | 0.1099 | ( 0 0 0) | 6.402A | 1 |
| Ti 2               | 0.1690  | 0.3811 | 0.3222 | ( 0 0 0) | 6.501A | 1 |
| Ti 3               | -0.3323 | 0.8429 | 0.3917 | (-1 0 0) | 6.528A | 1 |

Topology for Cd2

Atom Cd2 links by bridge ligands and has

| Common vertex with |         |        |        |          | R(A-A)  |   |
|--------------------|---------|--------|--------|----------|---------|---|
| Cl 1               | 0.0554  | 0.9195 | 0.4681 | ( 0 0 0) | 2.586A  | 1 |
| Cd 1               | 0.1746  | 0.7768 | 0.2481 | ( 0 0 0) | 3.805A  | 1 |
| Sc 1               | 0.1760  | 1.0991 | 0.2052 | ( 0 1 0) | 5.457A  | 1 |
| Ti 3               | 0.6677  | 0.8429 | 0.3917 | ( 0 0 0) | 6.449A  | 1 |
| Ti 3               | -0.3323 | 0.8429 | 0.3917 | (-1 0 0) | 6.541A  | 1 |
| Cr 1               | 0.1651  | 0.5286 | 1.0038 | ( 0 0 1) | 12.394A | 1 |

Topology for Cd3

Atom Cd3 links by bridge ligands and has

| Common vertex with |         |         |        |          | R(A-A)  |   |
|--------------------|---------|---------|--------|----------|---------|---|
| Cl 1               | 0.0554  | -0.0805 | 0.4681 | ( 0-1 0) | 2.496A  | 1 |
| Cl 1               | -0.0554 | 0.0805  | 0.5319 | ( 0 1 1) | 2.912A  | 1 |
| Ti 2               | 0.1690  | 0.3811  | 0.3222 | ( 0 0 0) | 6.274A  | 1 |
| Ti 3               | 0.6677  | -0.1571 | 0.3917 | ( 0-1 0) | 6.407A  | 1 |
| Co 1               | 0.2055  | -0.2932 | 1.0765 | ( 0-1 1) | 12.458A | 1 |

Structural group analysis

Structural group No 1

Structure consists of 3D framework with Cd3CoCrTi3ScCl

Coordination sequences

Cl1: 1 2 3 4 5 6 7 8 9 10  
 Num 3 11 25 59 105 173 238 317 432 551  
 Cum 4 15 40 99 204 377 615 932 1364 1915

Sc1: 1 2 3 4 5 6 7 8 9 10  
 Num 3 10 26 58 99 169 235 331 419 549  
 Cum 4 14 40 98 197 366 601 932 1351 1900

Ti1: 1 2 3 4 5 6 7 8 9 10

Num 4 13 28 59 105 173 244 335 417 561  
Cum 5 18 46 105 210 383 627 962 1379 1940

-----  
Ti2: 1 2 3 4 5 6 7 8 9 10  
Num 3 11 26 56 105 168 241 330 423 537  
Cum 4 15 41 97 202 370 611 941 1364 1901

-----  
Ti3: 1 2 3 4 5 6 7 8 9 10  
Num 4 15 27 63 112 168 241 341 417 553  
Cum 5 20 47 110 222 390 631 972 1389 1942

-----  
Cr1: 1 2 3 4 5 6 7 8 9 10  
Num 4 13 30 57 111 163 238 327 442 531  
Cum 5 18 48 105 216 379 617 944 1386 1917

-----  
Col: 1 2 3 4 5 6 7 8 9 10  
Num 6 14 32 66 111 176 248 331 431 563  
Cum 7 21 53 119 230 406 654 985 1416 1979

-----  
Cd1: 1 2 3 4 5 6 7 8 9 10  
Num 6 12 34 62 114 172 261 328 429 545  
Cum 7 19 53 115 229 401 662 990 1419 1964

-----  
Cd2: 1 2 3 4 5 6 7 8 9 10  
Num 6 13 34 65 112 172 242 332 428 554  
Cum 7 20 54 119 231 403 645 977 1405 1959

-----  
Cd3: 1 2 3 4 5 6 7 8 9 10  
Num 5 12 32 63 120 175 243 335 452 536  
Cum 6 18 50 113 233 408 651 986 1438 1974

-----  
TD10=1939

Vertex symbols for selected sublattice

-----  
Cl1 Point symbol: {4<sup>2</sup>.6}  
Extended point symbol: [4.4.6]

-----  
Sc1 Point symbol: {3.7.8}  
Extended point symbol: [3.7(2).8(5)]

-----  
Ti1 Point symbol: {3<sup>2</sup>.6<sup>2</sup>.7<sup>2</sup>}  
Extended point symbol: [3.3.6.6.7(2).7(2)]

-----  
Ti2 Point symbol: {3.7.8}  
Extended point symbol: [3.7(2).8(5)]

-----  
Ti3 Point symbol: {3.4.6<sup>2</sup>.7<sup>2</sup>}  
Extended point symbol:[3.4.6.6.7.7(2)]

-----  
Cr1 Point symbol: {3.5.6.7.8<sup>2</sup>}  
Extended point symbol:[3.8.5(2).8(6).6(3).7(2)]

-----  
Co1 Point symbol: {3<sup>3</sup>.4.5.6<sup>3</sup>.7<sup>6</sup>.8}   
Extended point symbol:[3.3.3.4.5(2).6.6.6(2).7.7.7.7.7(2).8]

-----  
Cd1 Point symbol: {3<sup>4</sup>.4<sup>2</sup>.6<sup>2</sup>.7<sup>4</sup>.8<sup>2</sup>.9}   
Extended point symbol:[3.3.3.3.4.4.6.6.7.7.7(2).7(2).8(3).8(3).9(4)]

-----  
Cd2 Point symbol: {3<sup>2</sup>.4<sup>2</sup>.5<sup>2</sup>.6<sup>2</sup>.7<sup>4</sup>.8<sup>3</sup>}   
Extended point symbol:[3.3.4.4.5.5.6.6.7.7.7.7(2).8(2).8(2).8(2)]

-----  
Cd3 Point symbol: {4<sup>2</sup>.5<sup>2</sup>.6.7<sup>3</sup>.8.9}   
Extended point symbol:[4.4.5.5.6.7.7.7.8(2).9]

-----  
Point symbol for net:

{3.4.6<sup>2</sup>.7<sup>2</sup>} {3.5.6.7.8<sup>2</sup>} {3.7.8} 2 {3<sup>2</sup>.4<sup>2</sup>.5<sup>2</sup>.6<sup>2</sup>.7<sup>4</sup>.8<sup>3</sup>} {3<sup>2</sup>.6<sup>2</sup>.7<sup>2</sup>} {3<sup>3</sup>.4.5.6<sup>3</sup>.7<sup>6</sup>.8} {3<sup>4</sup>.4<sup>2</sup>.6<sup>2</sup>.7<sup>4</sup>.8<sup>2</sup>.9} {4<sup>2</sup>.5<sup>2</sup>.6.7<sup>3</sup>.8.9} {4<sup>2</sup>.6}   
3,3,3,4,4,4,5,6,6,6-c net with stoichiometry (3-c)(3-c)(3-c)(4-c)(4-c)(4-c)(5-c)(6-c)(6-c)(6-c); 10-nodal net

## References

S1 A. L. Spek, *PLATON*, Utrecht University: Utrecht, The Netherlands, 2003.

S2 The network topology was evaluated by the program TOPOS-4.0; see <http://www.topos.ssu.samara.ru>.

V. A. Blatov, *IUCr CompComm Newsletter*, 2006, **7**, 4.
